# Supplementary material for: Afucosylated Plasmodium falciparum-specific IgG is induced by infection but not by subunit vaccination
Source: PubMed Central journal article supplement (PMC8492741; doi:10.1038/s41467-021-26118-w), 2021-10-05
Supplement: 41467_2021_26118_MOESM1_ESM.pdf [file 41467_2021_26118_MOESM1_ESM.pdf]

# Afucosylated *Plasmodium falciparum*-specific IgG is induced by infection but not by subunit vaccination

## - Supplementary information -

**Authors:** Mads Delbo Larsen,<sup>1§</sup> Mary Lopez-Perez,<sup>2§</sup> Emmanuel Kakra Dickson,<sup>3</sup> Paulina Ampomah,<sup>4</sup> Nicaise Tuikue Ndam,<sup>5</sup> Jan Nouta,<sup>6</sup> Carolien A M Koeleman,<sup>6</sup> Agnes L Hipgrave Ederveen,<sup>6</sup> Benjamin Mordmüller,<sup>7,8</sup> Ali Salanti,<sup>2</sup> Morten Agertoug Nielsen,<sup>2</sup> Achille Massougbodji,<sup>9</sup> C. Ellen van der Schoot,<sup>1</sup> Michael F. Ofori,<sup>3</sup> Manfred Wuhrer,<sup>6</sup> Lars Hviid<sup>2,10\*#</sup>, and Gestur Vidarsson<sup>1\*#</sup>

<sup>§</sup> These authors contributed equally

\*These authors jointly supervised this work

#Correspondence: Gestur Vidarsson ([g.vidarsson@sanquin.nl](mailto:g.vidarsson@sanquin.nl)) or Lars Hviid ([lhviid@sund.ku.dk](mailto:lhviid@sund.ku.dk))

## **This PDF file includes:**

Supplementary figures S1-S6

Supplementary tables S1-S4

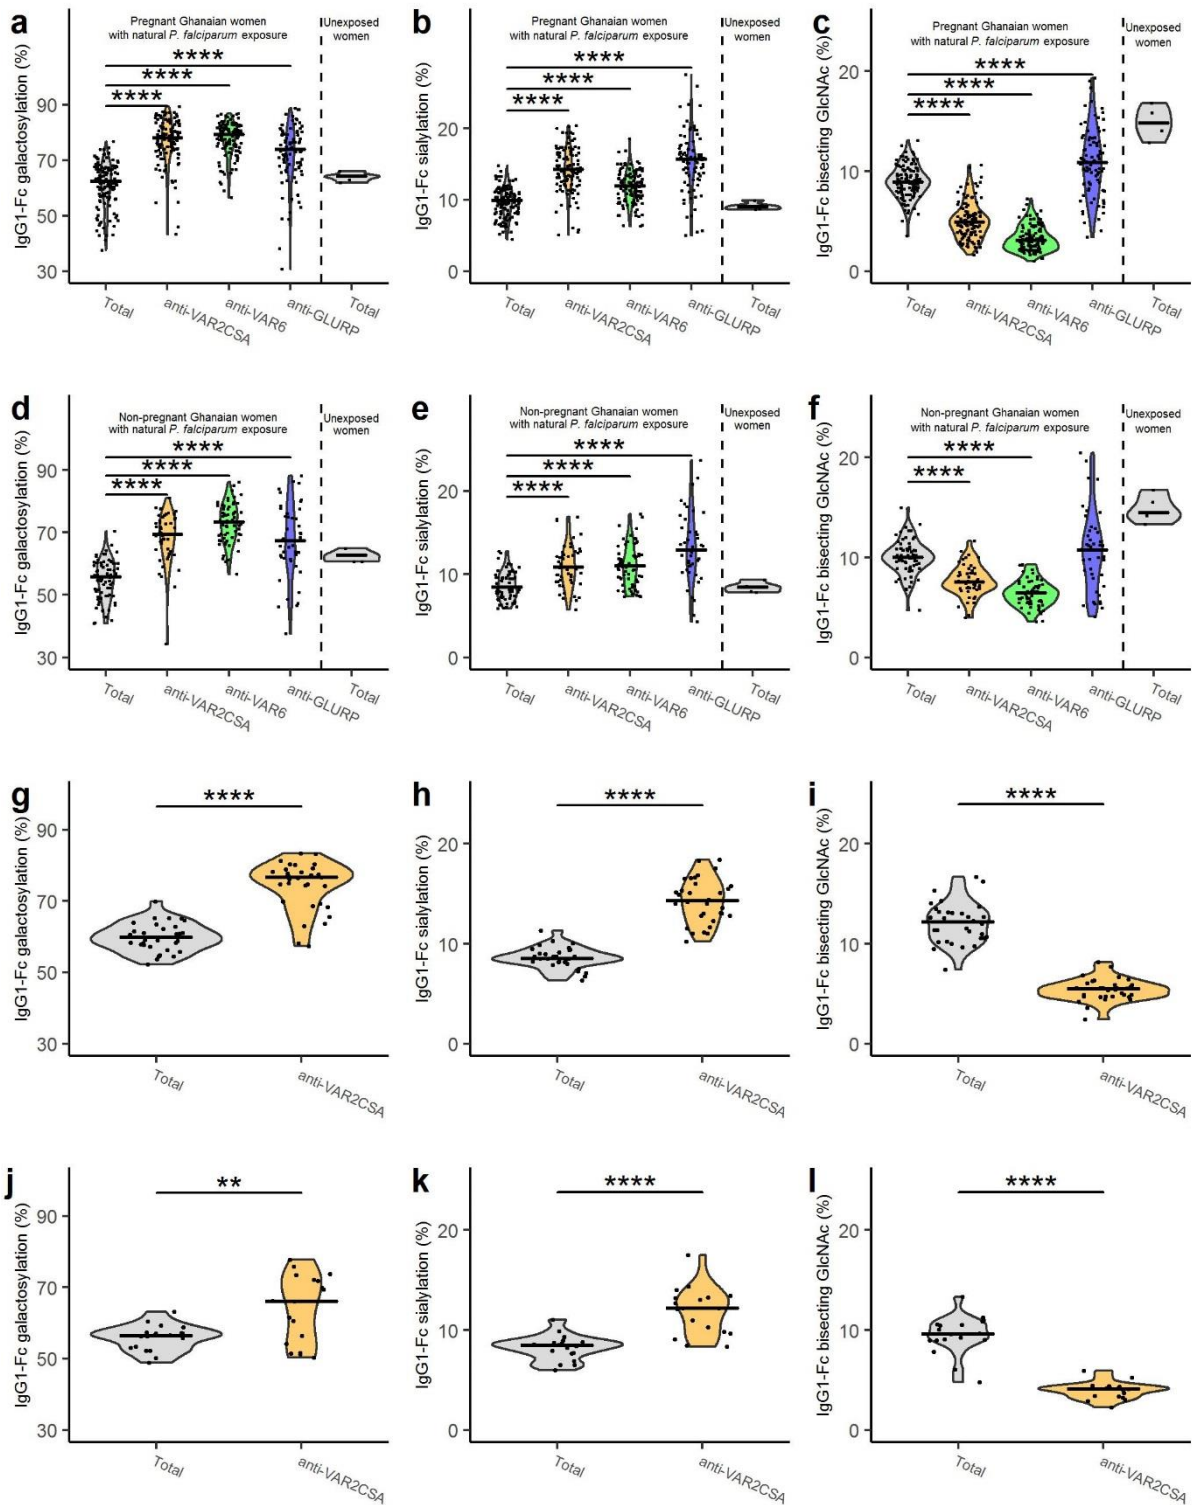

**Supplementary Figure 1. Fc glycosylation traits of *P. falciparum*-specific IgG in pregnant women**

(a, d, g, and j) Fc galactosylation-, (b, e, h, and k) Fc sialylation-, and (c, f, i, and l) Fc bisecting GlcNAc levels of total IgG1 (gray) and IgG1 with specificity for VAR2CSA (orange), VAR6 (green), and GLURP (blue) in (a to c) pregnant Ghanaian women (Total IgG n=127; VAR2CSA n=117; VAR6 n=121; GLURP = 88), (d to f) non-pregnant Ghanaian women (Total IgG n=72; VAR2CSA n=50; VAR6 n=65; GLURP = 43), (g to i) *P. falciparum*-naïve German (n =32) and (j to l) VAR2CSA-naïve Beninese vaccinees (n = 18). Medians and densities are shown. Statistically significant pairwise differences between antigen-specific IgG and total IgG (multiple two-sided Wilcoxon signed rank tests with Bonferroni correction) are indicated (\*\*: P<0.01; \*\*\*\*: P<0.0001)..

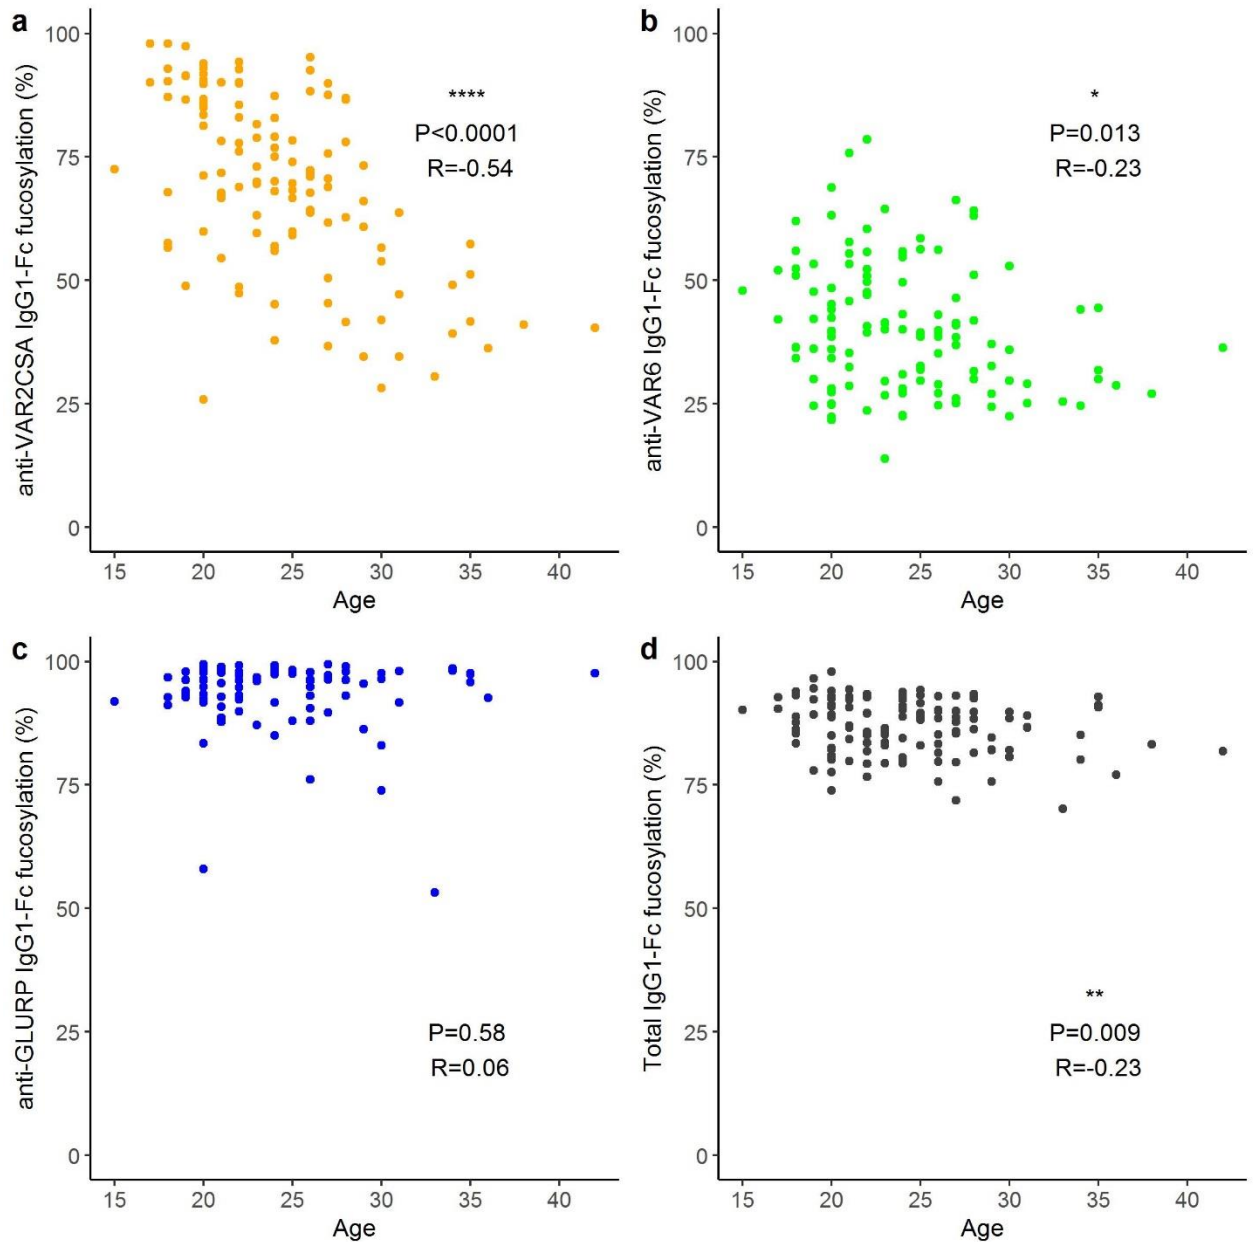

**Supplementary Figure 2. Fc fucosylation of naturally acquired PfEMP1-specific IgG correlates with age**

Correlations of (a) VAR2CSA- (n=117), (b) VAR6-(n=121), (c) GLURP-specific (n=88) and (d) total IgG1-Fc fucosylation levels (n=127) with age. P-values, and correlation coefficients are shown. Statistical significance of Spearman's correlations. \*:  $P < 0.05$ ; \*\*:  $P < 0.01$ ; \*\*\*:  $P < 0.001$ ; \*\*\*\*:  $P < 0.0001$ .

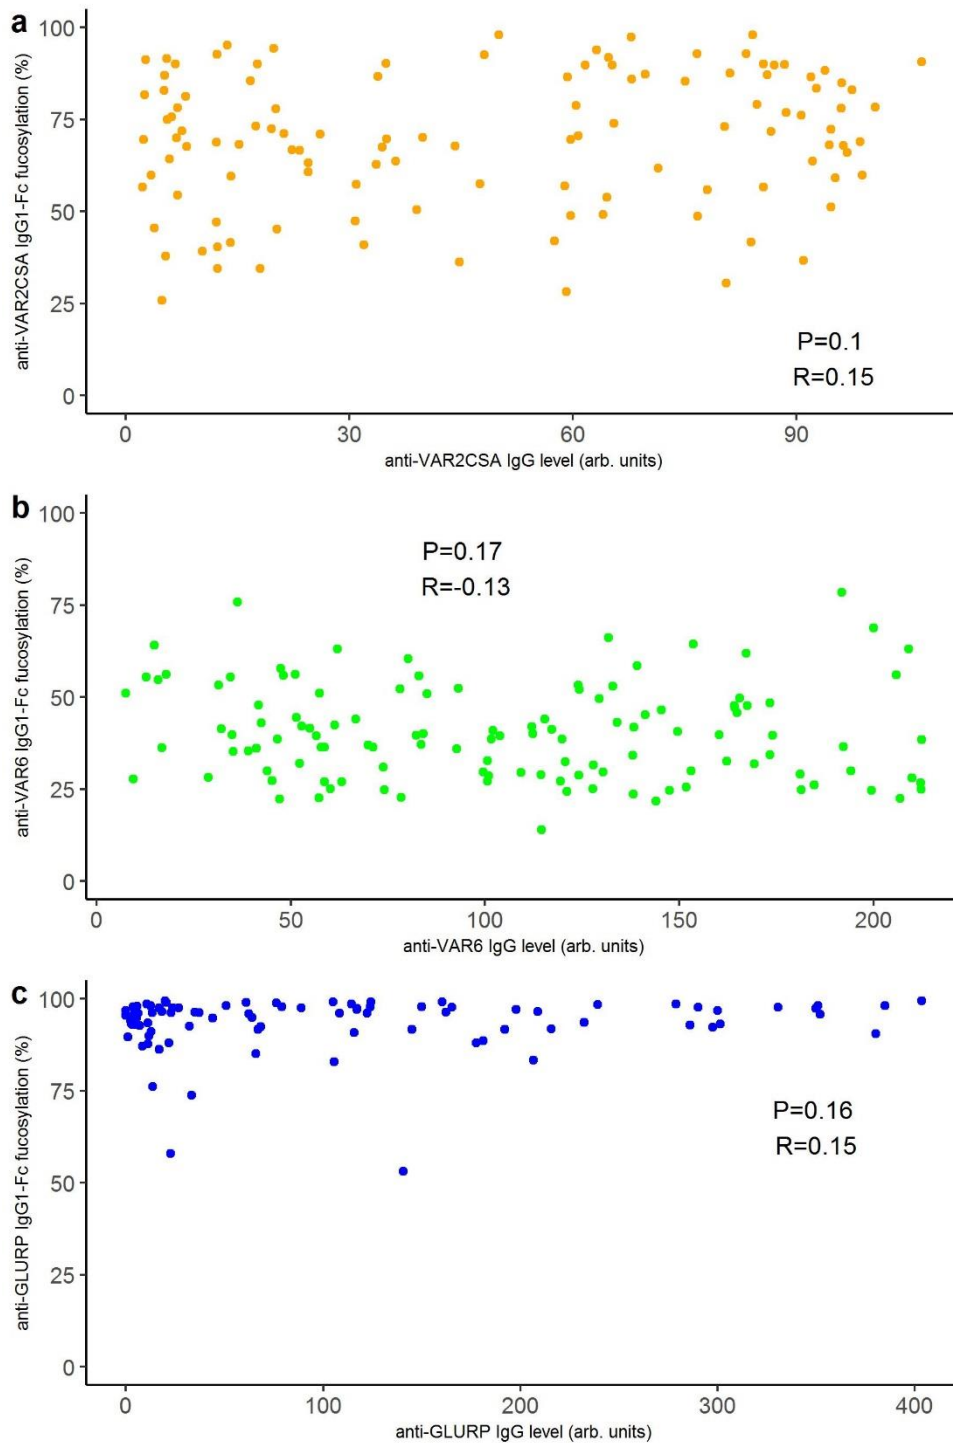

**Supplementary Figure 3. No correlation between IgG levels and Fc fucosylation.**

Correlations of IgG levels and Fc fucosylation of (a) VAR2CSA-(n=117), (b) VAR6-(n=121), and (c) GLURP-specific (n=88) IgG1. Spearman's coefficient and P values are shown.

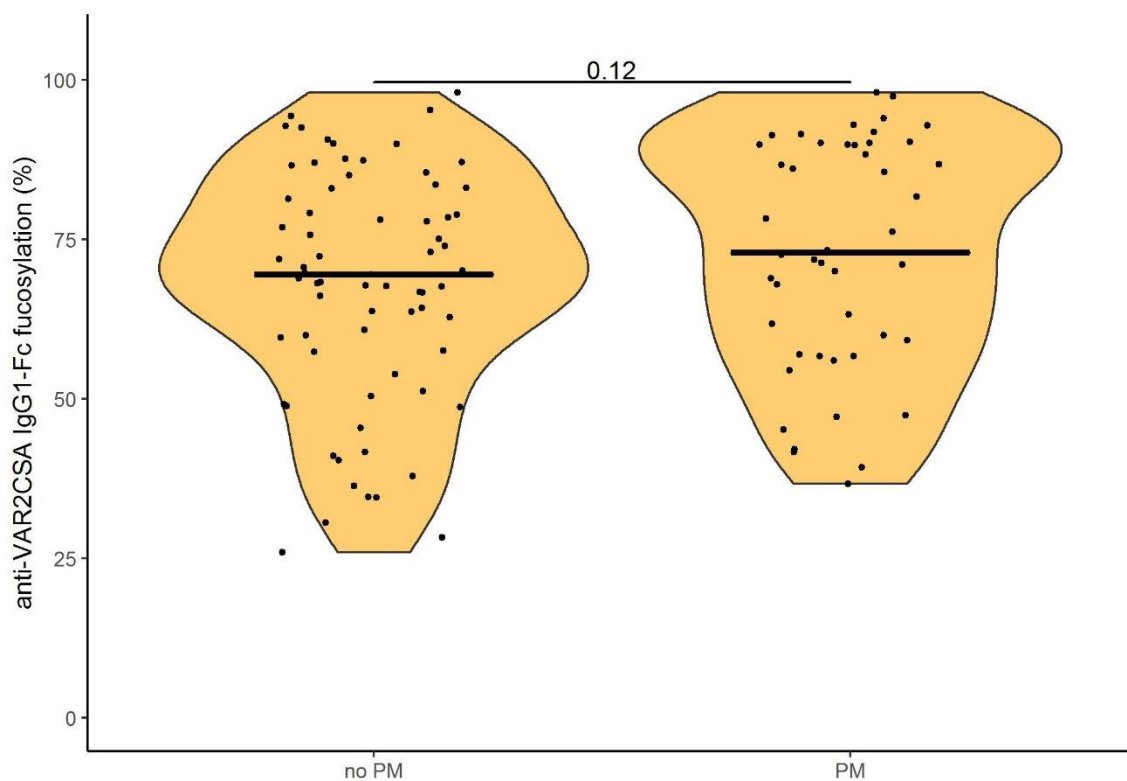

**Supplementary Figure 4. No PM-dependent difference in Fc fucoylation levels of VAR2CSA-specific IgG.** IgG Fc fucoylation levels of VAR2CSA-specific IgG are shown for women with and without PM. Statistical significance was tested using a two-sided Mann-Whitney test. Median, P value, and density are shown.

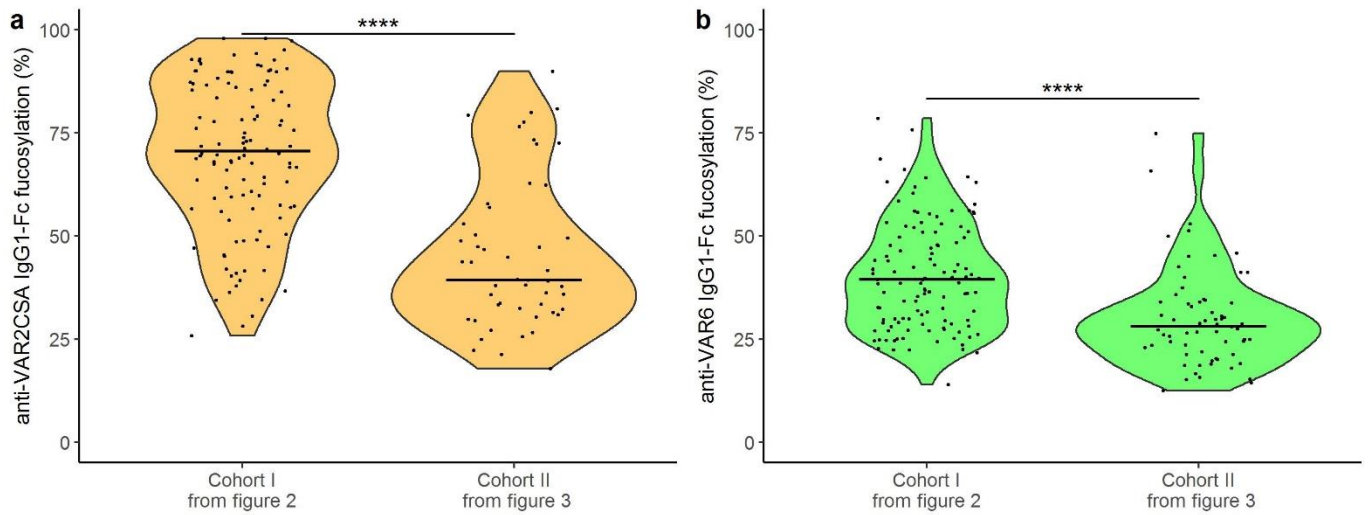

**Supplementary Figure 5. Both VAR2CSA- and VAR6-specific Fc afucosylation are more pronounced in cohort of non-pregnant Ghanaian women. (a) VAR2CSA- and (b) VAR6-specific IgG Fc fucosylation of from the cohort of pregnant women and non-pregnant women. Data are aggregated from Figures 2-3. Statistically significant differences (Mann-Whitney) are indicated (\*\*\*\*:  $P < 0.0001$ ).**

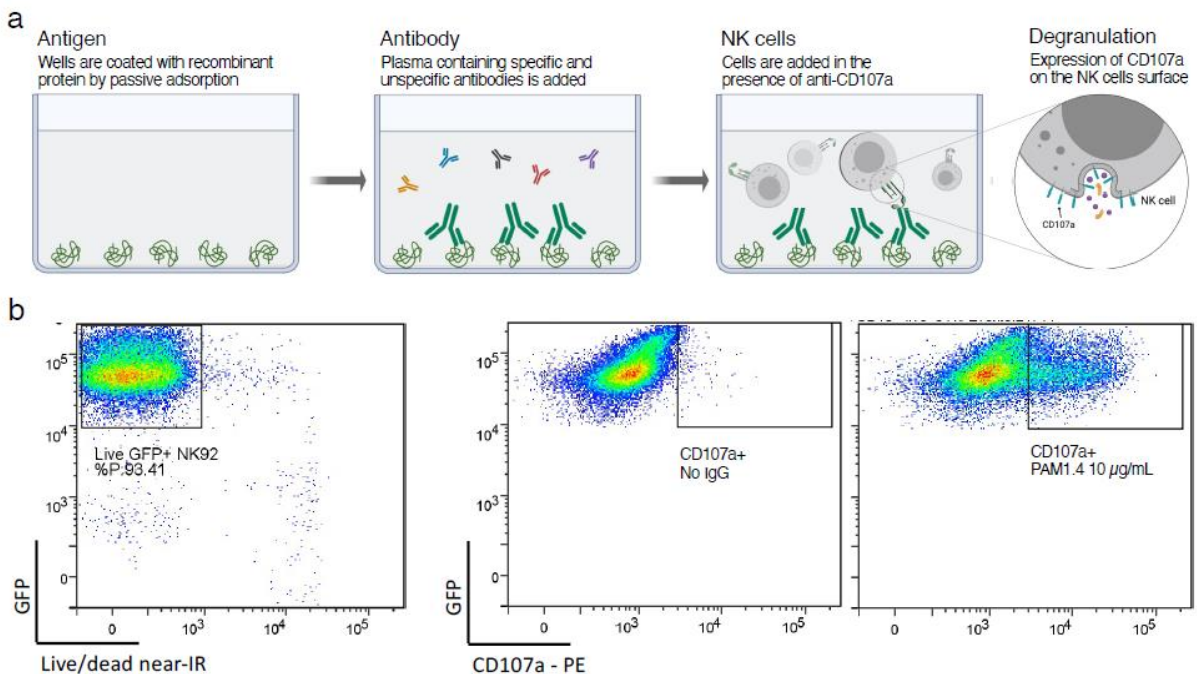

**Supplementary Figure 6 . ADCC NK cell activation assay. (a)** Schematic representation of plate-based assay. Created with Biorender.com. **(b)** Gating strategy for flow cytometry analysis. NK92 live cells expressing CD16 were gated as GFP<sup>+</sup> and live/dead<sup>-</sup>. This population was used to estimate the percentage of NK cells expressing CD107a as a marker of ADCC. Representative dot plots of CD107a expression in the absence of antibodies (centre) or with 10 µg/mL human monoclonal anti-VAR2CSA (PAM1.4; right).

# Supplementary Table 1

## Prediction of maternal hemoglobin level at birth by generalized linear model

| Variable                      | Coefficient | P value | Significance    |
|-------------------------------|-------------|---------|-----------------|
| VAR2CSA IgG1 fucosylation (%) | -0.0173     | 0.0713  | Not significant |
| Placental malaria             | -0.583      | 0.0652  | Not significant |
| Number of parities            | -0.167      | 0.124   | Not significant |

P values and statically significance of each variable defined by a Wald-test of a generalized linear model including described variables are provided.



# Supplementary Table 2

## Prediction of birth weight by generalized linear model

| Variable                      | Coefficient | P value | Significance    |
|-------------------------------|-------------|---------|-----------------|
| VAR2CSA IgG1 fucosylation (%) | 0.0038      | 0.187   | Not significant |
| Placental malaria             | -0.3271     | 0.0009  | ***             |
| Number of parities            | 0.038       | 0.250   | Not significant |

P values and statically significance of each variable defined by a Wald-test of a generalized linear model including described variables are provided. (\*\*\*: P<0.001)

# Supplementary Table 3

## Summary statistics of plasma donors studies

| Cohort                                               | Origin  | Donors (N) | Women (N; %)      | Age (median; inter-quartile range (in years)) | Ref.          |
|------------------------------------------------------|---------|------------|-------------------|-----------------------------------------------|---------------|
| <i>P. falciparum</i> -exposed and pregnant           | Ghana   | 127        | 127; 100%         | 24; 20-27                                     | 48            |
| <i>P. falciparum</i> -exposed and non-pregnant women | Ghana   | 72         | 72; 100%          | 29; 23-38                                     | 53            |
| Non-exposed vaccinees                                | Germany | 36         | n.a. <sup>1</sup> | Adults <sup>1</sup>                           | 60            |
| <i>P. falciparum</i> -exposed vaccinees              | Benin   | 21         | 21; 100%          | Adults <sup>1</sup>                           | (unpublished) |

<sup>1</sup> Data not available due to blinding of the clinical trial data

# Supplementary Table 4

## Overview of included Fc glycopeptides

| N-Glycopeptide        | m/z 2+   | m/z 3+    | Retention time (sec) |
|-----------------------|----------|-----------|----------------------|
| IgG1 H3N4F1S0 [G0F]   | 1317.526 | 878.687   | 80                   |
| IgG1 H4N4F1S0 [G1F]   | 1398.552 | 932.704   | 78                   |
| IgG1 H5N4F1S0 [G2F]   | 1479.579 | 986.722   | 77                   |
| IgG1 H3N5F1S0 [G0FN]  | 1419.066 | 946.380   | 81                   |
| IgG1 H4N5F1S0 [G1FN]  | 1500.092 | 1000.398  | 79                   |
| IgG1 H5N5F1S0 [G2FN]  | 1581.119 | 1054.415  | 78                   |
| IgG1 H3N4F0S0 [G0]    | 1244.497 | 830.001   | 83                   |
| IgG1 H4N4F0S0 [G1]    | 1325.524 | 884.018   | 82                   |
| IgG1 H5N4F0S0 [G2]    | 1406.550 | 938.036   | 81                   |
| IgG1 H3N5F0S0 [G0N]   | 1346.037 | 897.694   | 83                   |
| IgG1 H4N5F0S0 [G1N]   | 1427.063 | 951.712   | 82                   |
| IgG1 H5N5F0S0 [G2N]   | 1508.090 | 1005.729  | 79                   |
| IgG1 H4N4F1S1 [G1FS]  | 1544.100 | 1029.736  | 77                   |
| IgG1 H5N4F1S1 [G2FS]  | 1625.127 | 1083.754  | 75                   |
| IgG1 H4N5F1S1 [G1FNS] | 1645.640 | 1097.429  | 77                   |
| IgG1 H5N5F1S1 [G2FNS] | 1726.667 | 1151.447  | 77                   |
| IgG1 H4N4F0S1 [G1S]   | 1471.071 | 981.050   | 80                   |
| IgG1 H5N4F0S1 [G2S]   | 1552.098 | 1035.068  | 79                   |
| IgG1 H4N5F0S1 [G1NS]  | 1572.611 | 1048.743  | 77                   |
| IgG1 H5N5F0S1 [G2NS]  | 1653.638 | 1102.7610 | 77                   |
| IgG1 H5N4F1S2 [G2FS2] | 1770.675 | 1180.786  | 76                   |
