# Supplementary material for: Afucosylated Plasmodium falciparum-specific IgG is induced by infection but not by subunit vaccination
Source: PubMed Central journal article supplement (PMC8492741; doi:10.1038/s41467-021-26118-w), 2021-10-05
Supplement: 41467_2021_26118_MOESM3_ESM.pdf [file 41467_2021_26118_MOESM3_ESM.pdf]

The full content of this file cannot be displayed with your current PDF viewer. Please update to the latest possible version to view this document.
